# Supplementary material for: Structure and orientation of small molecules dissolved in the liquid crystalline phases of CsPFO/water system by multinuclear NMR
Source: Royal Society of Chemistry journal article supplement (doi:10.1039/b901895f), 2009-01-01
Supplement: b901895f.pdf [file b901895f.pdf]

## Supplementary Material

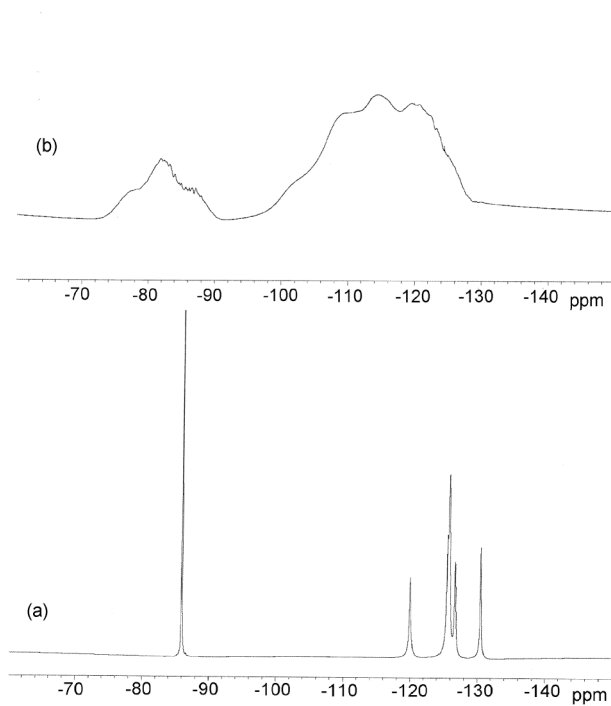

**Figure S1**  $^{19}\text{F}$  spectra of CsPFO/D<sub>2</sub>O in the isotropic (a) and nematic phases (b).

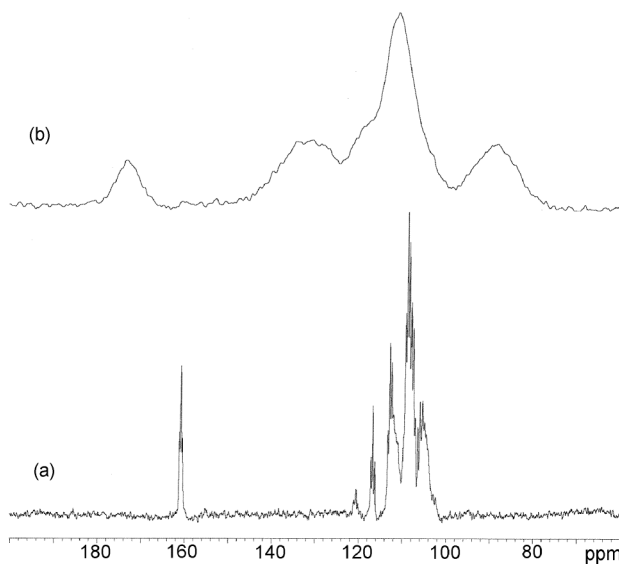

**Figure S2**  $^{13}\text{C}$  spectra of CsPFO/D<sub>2</sub>O in the isotropic (a) and nematic phases (b).

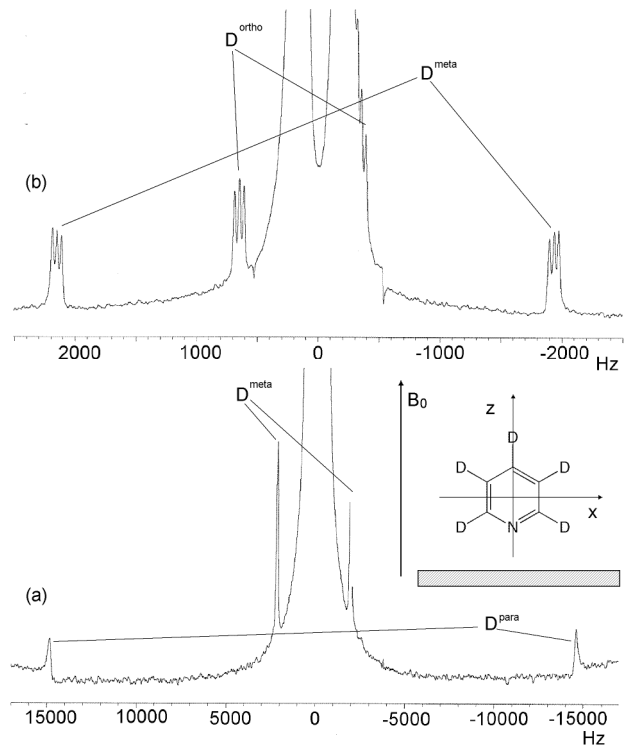

**Figure S3** (a)  $^2\text{H}$  spectrum of pyridine- $\text{d}_5$  in the nematic phase of CsPFO/ $\text{D}_2\text{O}$  ( $T = 21.3^\circ\text{C}$ ) (b) expansion of the  $-2500 \div 2500$  Hz region (the zero of the frequencies axis has been arbitrarily chosen in the middle of the  $\text{D}_2\text{O}$  doublet). In the inset the molecular frame in which the pyridine order tensor is diagonal is shown, together with the indication of the magnetic field ( $B_0$ ) direction, parallel to the symmetry axis of the micelle, here sketched as a rectangle.

**Table S1** Order parameters of L-alanine in the nematic and lamellar phases of CsPFO/D<sub>2</sub>O, both in the (*x*, *y*, *z*) molecular axes frame (see text) and in the principal axes frame of the order tensor itself (see Figure 4). The uncertainties on the results are of some units of the last digit quoted.

|                                | $S_{xx}$         | $S_{yy}$        | $S_{zz}$        | $S_{xy}$    | $S_{xz}$   | $S_{yz}$    |
|--------------------------------|------------------|-----------------|-----------------|-------------|------------|-------------|
|                                | $S^D_{xx}$       | $S^D_{yy}$      | $S^D_{zz}$      |             |            |             |
| $T = 28\text{ }^\circ\text{C}$ | -0.015<br>-0.015 | 0.018<br>-0.010 | -0.003<br>0.026 | -0.001<br>- | 0.002<br>- | -0.014<br>- |
| $T = 24\text{ }^\circ\text{C}$ | -0.021<br>-0.024 | 0.027<br>-0.015 | -0.006<br>0.039 | -0.002<br>- | 0.006<br>- | -0.021<br>- |
